# Supplementary material
Source: publisher figshare collection journal article supplement (https://acs.figshare.com/ndownloader/files/4794571)
Supplement: Supplementary file 1 [file 4794571]

■ Supporting information

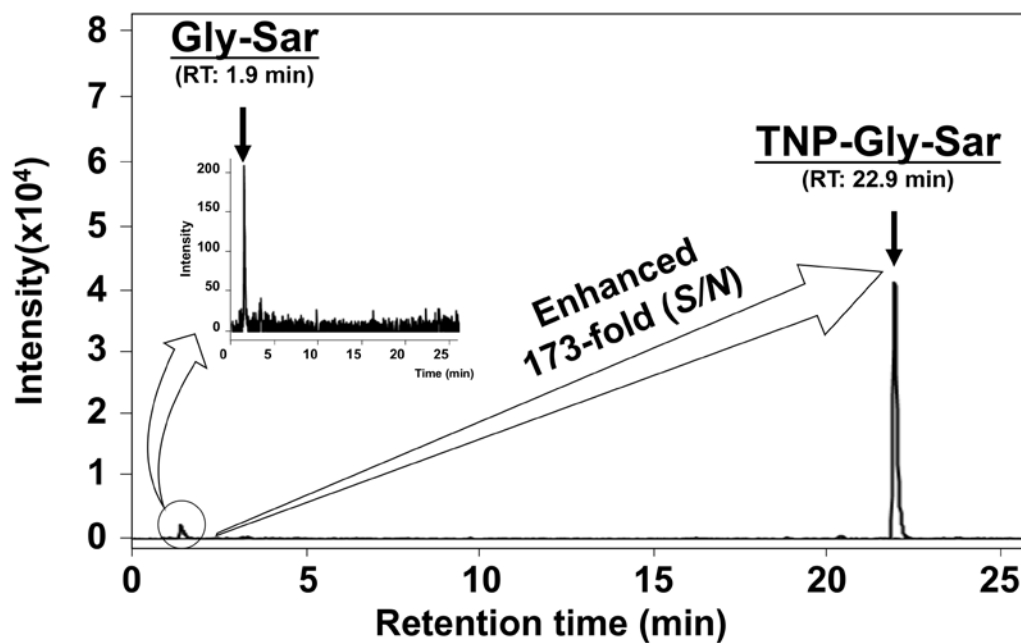

**Figure S1. Enhanced detection of TNBS-derivatized Gly-Sar by LC-TOF-MS.** Ten  $\mu$ M Gly-Sar was derivatized with 150 mM TNBS at pH 8.5. The MS chromatogram shows the enhanced MS detection of TNBS-derivatized Gly-Sar (or TNP-Gly-Sar,  $m/z$  358.0630), compared to underivatized Gly-Sar ( $m/z$  147.0764). LC-TOF-MS conditions were described in the Materials and Methods section.

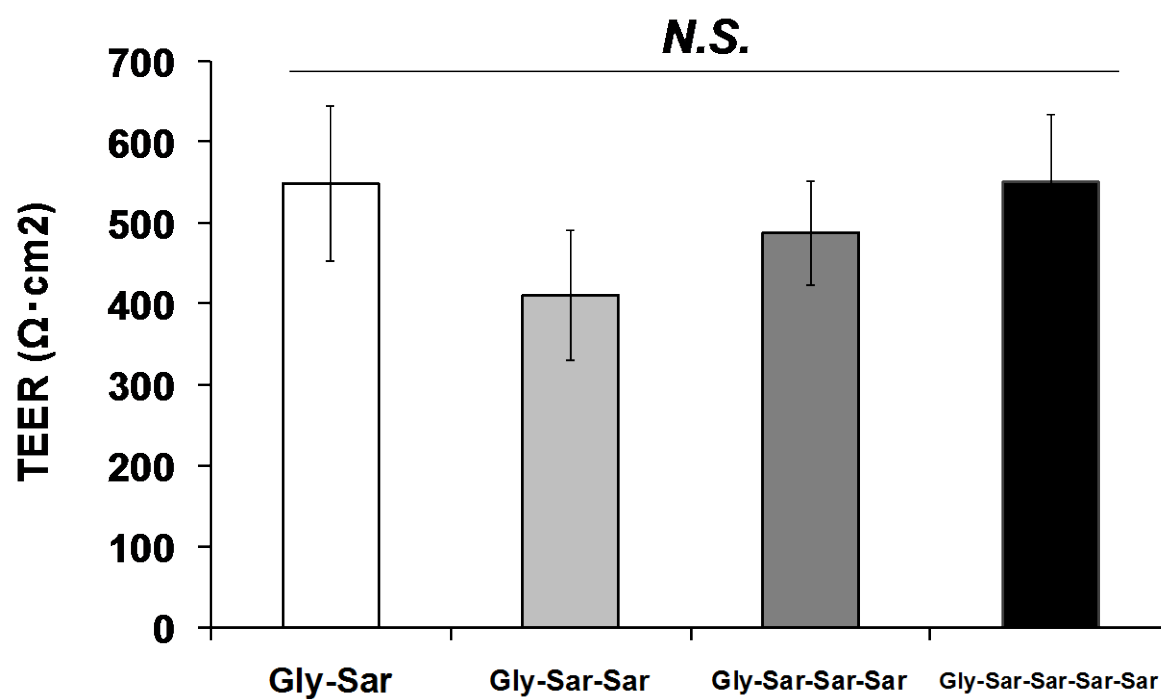

**Figure S2. TEER values for the Caco-2 monolayers used in the transport experiments summarized in Table 1.** TEER values were measured by using a Millicell ERS-2 epithelial volt-ohm meter. Values are expressed as the mean  $\pm$  SEM,  $n=3$ . Statistical differences were measured by one-way ANOVA. *N.S.*, not significant.
